# Supplementary material
Source: publisher figshare collection journal article supplement (https://frontiersin.figshare.com/ndownloader/files/13643618)

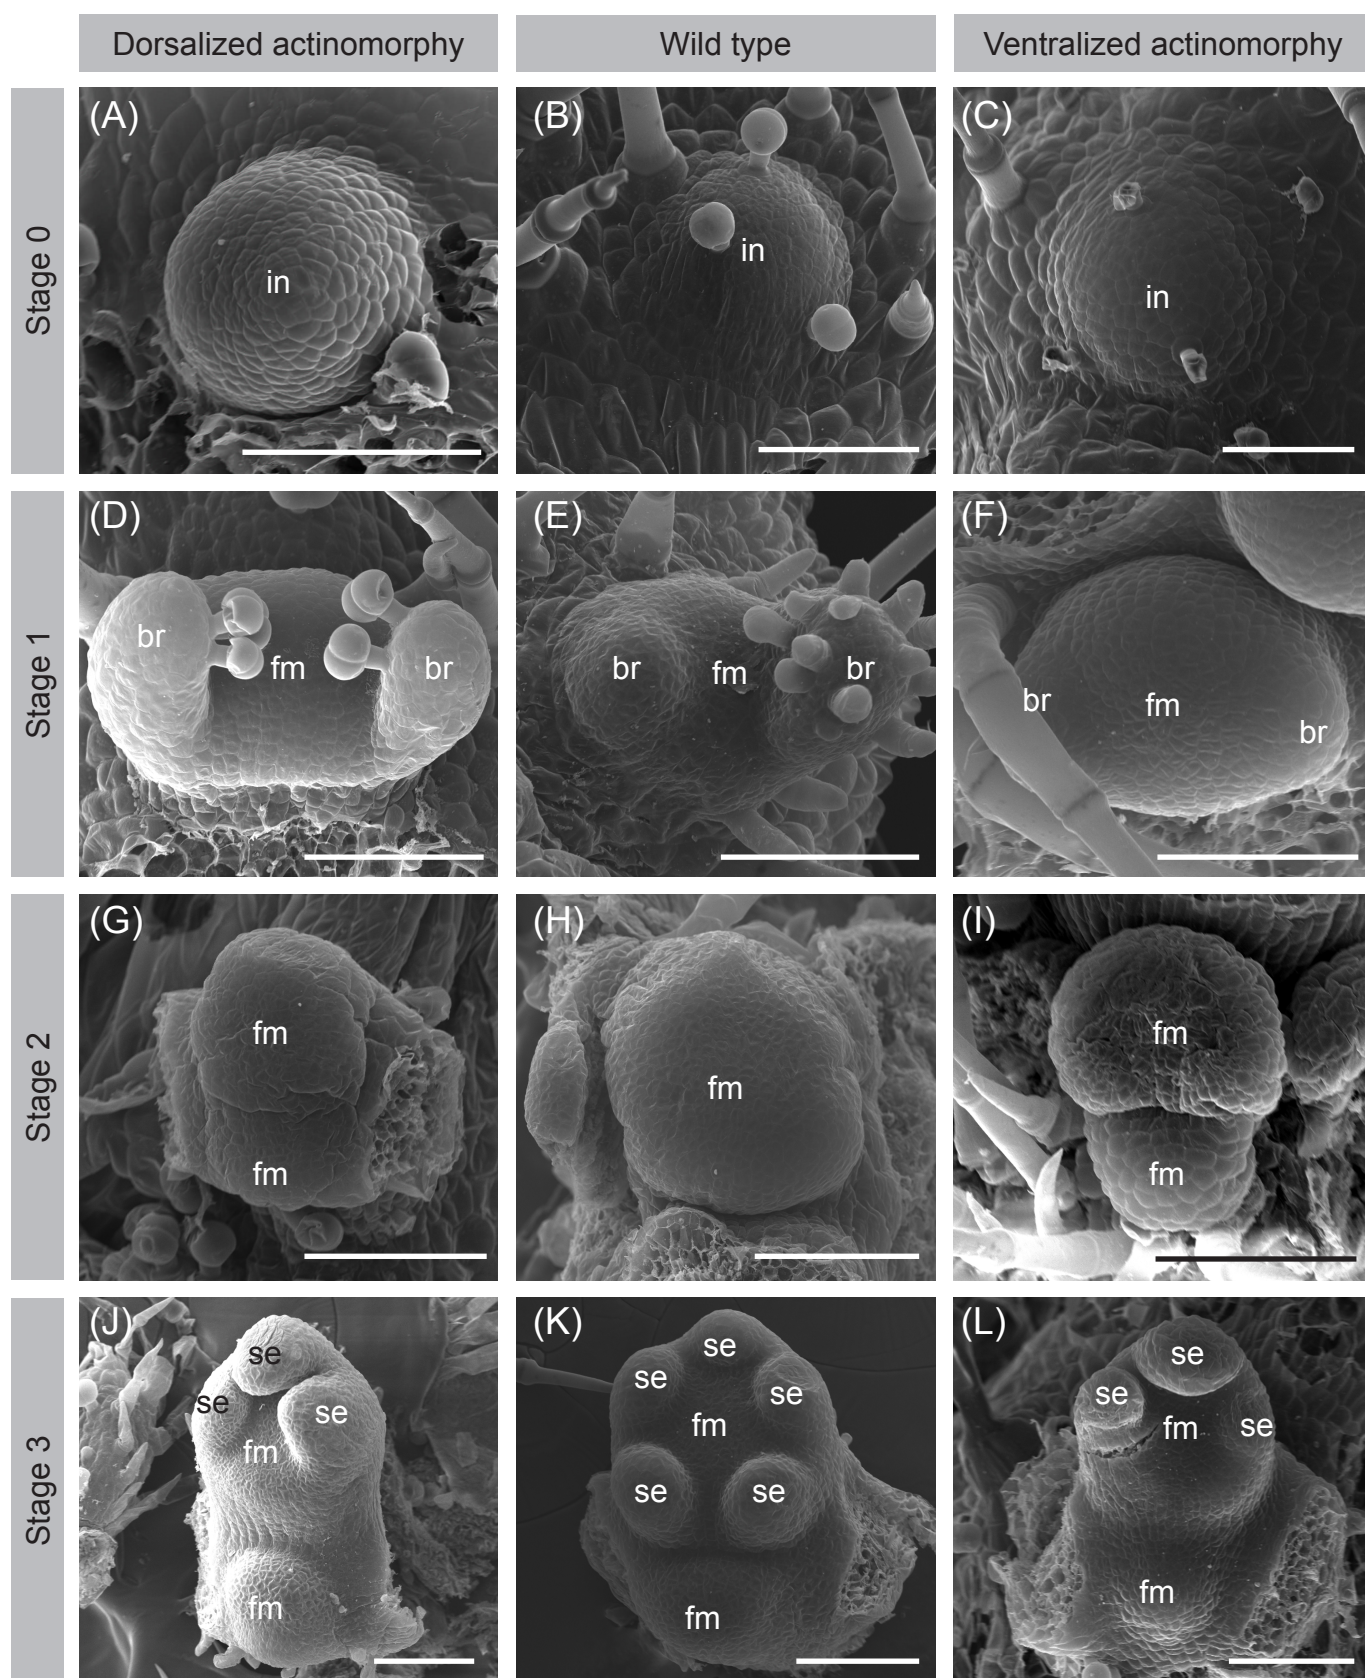



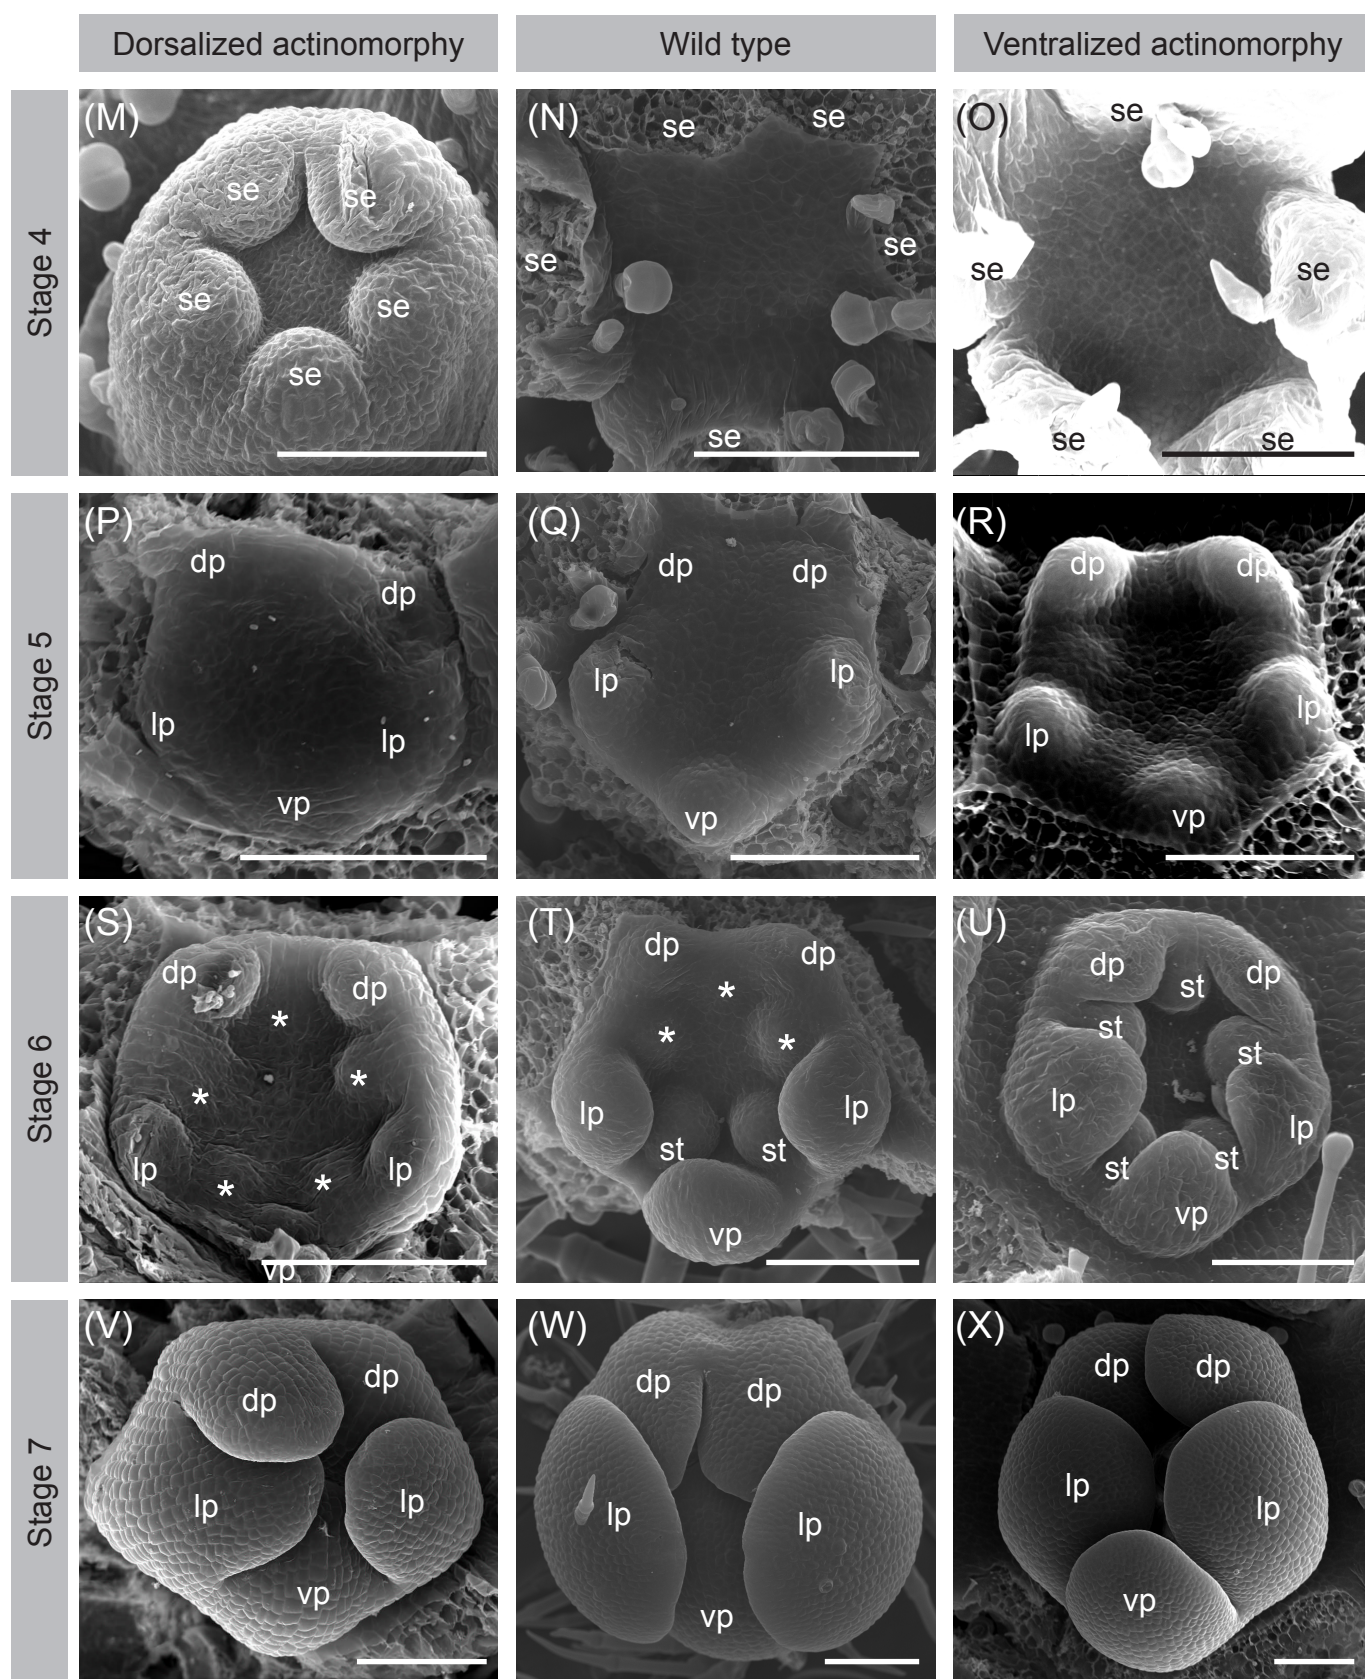

Dorsalized actinomorphy

Wild type

Ventralized actinomorphy

Stage 7 (petal removed)

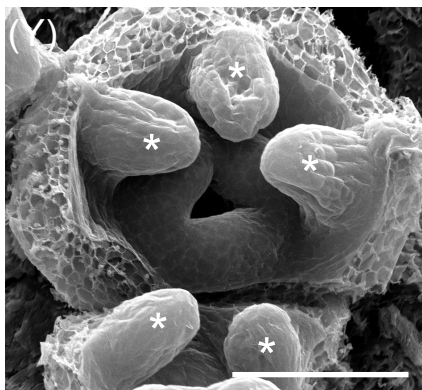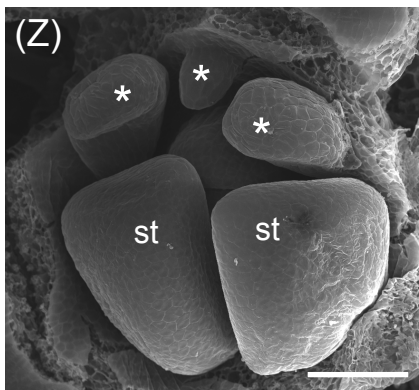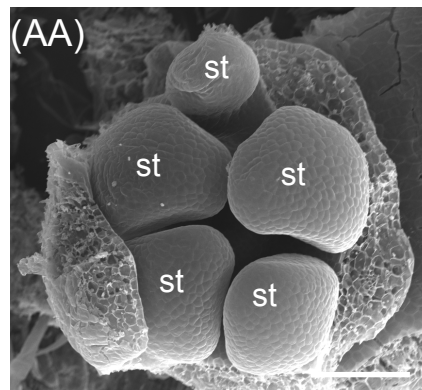

Supplement: Supplementary file [file 13643618]
